# Supplementary material
Source: PubMed Central journal article supplement (PMC8085840)
Supplement: ajcr0011-1286-f9.pdf [file ajcr0011-1286-f9.pdf]

## Pinin promotes prostate cancer progression

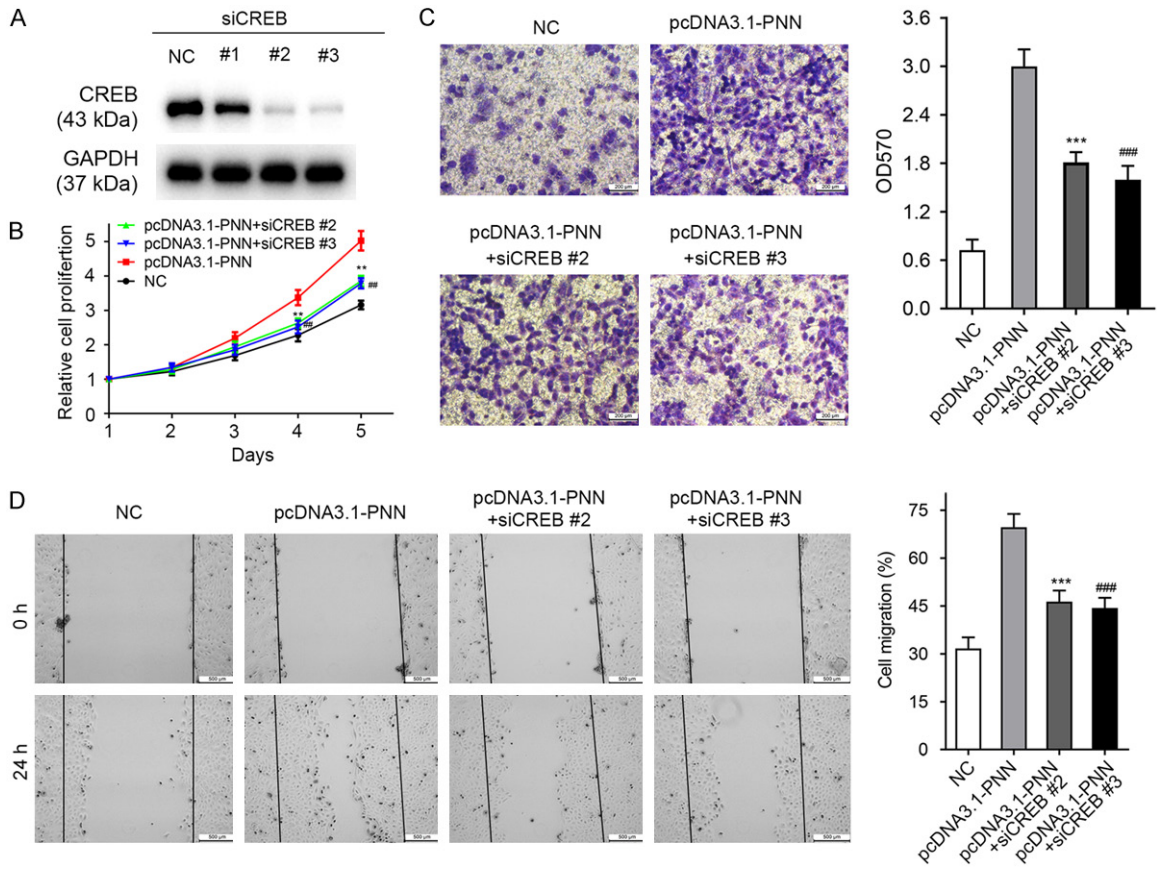

**Figure S1.** PNN regulates prostate cancer cell proliferation and migration via CREB. A. The protein level of CREB was determined after cells were transfected with siCREB. siCREB #2 and siCREB #3 could knockdown CREB efficiently. B-D. CREB involved in PNN-mediated cell proliferation, invasion and migration. The MTS, transwell, and wound healing assays demonstrated that the PNN overexpression-caused cell phenotype changes could be reversed by CREB knockdown. The scale bar = 200  $\mu$ m (C), 500  $\mu$ m (D). \*\*\* $P$  < 0.001, ### $P$  < 0.001.
